# Supplementary material
Source: PubMed Central journal article supplement (PMC11267638)
Supplement: esp-0031-supplemental_table_legends.pdf [file esp-0031-supplemental_table_legends.pdf]

## SUPPLEMENTAL TABLE LEGENDS

### Table S1. Compilation of useful websites.

**Table S2. Compilation of all small proteins whose synthesis has been verified thus far.** The table will periodically be updated at <https://www.nichd.nih.gov/about/org/dir/affinity-groups/CSB/storz/data-protocols#RNAs>. Please direct corrections to Gisela Storz at [storzg@mail.nih.gov](mailto:storzg@mail.nih.gov).

**Column A** = Protein name.

**Column B** = Alternative names.

**Column C** = Number of amino acids in protein.

**Column D** = Identified functions.

**Column E** = Left coordinate for small protein gene with respect to sense (clockwise or Watson strand) based on *E. coli* MG1655 genome version NC\_000913.3.

**Column F** = Right coordinate for small protein gene with respect to sense (clockwise or Watson strand) based on *E. coli* MG1655 genome version NC\_000913.3.

**Column G** = Orientation of gene with respect to sense (clockwise or Watson strand) based on *E. coli* MG1655 genome version NC\_000913.3.

**Column H** = Adjacent genes. sORFs encoded within larger genes are noted, as well as their orientation relative to the larger gene.

**Column I** = Orientation of the sORF and adjacent genes. For the orientation, “>” corresponds to the sense (clockwise or Watson) strand and “<” corresponds to the antisense strand. The sORF arrow is in bold. “)” indicates the sORF overlaps with the adjacent gene. “[” indicates the sORF is internal to a larger gene, with the sORF orientation being designated first and the larger gene orientation designated second.

**Column J** = Method by which small protein was detected.

**Column K** = Predicted transmembrane helix.

**Column L** = Localization determined.

**Column M** = Amino acid sequence. “\*” corresponds to stop codon.

**Column N** = Nucleotide sequence.

**Column O** = Sequence of start codon (red) and 30 nucleotides upstream. Stretches of A and G residues of 4 or more (which could correspond to Shine Dalgarno sequences) located between 4 and 20 nucleotides upstream of the start codon are indicated in blue.

**Column P** = Reference for primary identification.

**Column Q** = PMID for primary identification.

**Column R** = Other relevant references.

**Column S** = PMID for other relevant references.

**Table S3. Compilation of all sORFs for which expression has been tested by for which synthesis has not yet been detected as of 2019.**

**Column A** = Name.

**Column B** = Number of predicted amino acids in protein.

**Column C** = Left coordinate for small protein gene with respect to sense (clockwise or Watson strand) based on *E. coli* MG1655 genome version NC\_000913.3.

**Column D** = Right coordinate for small protein gene with respect to sense (clockwise or Watson strand) based on *E. coli* MG1655 genome version NC\_000913.3.

**Column E** = Orientation of gene with respect to sense (clockwise or Watson strand) based on *E. coli* MG1655 genome version NC\_000913.3.

**Column F** = Adjacent genes.

**Column G** = Orientation of adjacent genes. ). For the orientation, “>” corresponds to the sense (clockwise or Watson) strand and “<” corresponds to the antisense strand.

**Column H** = Detection method attempted.

**Column I** = Predicted transmembrane helix.

**Column J** = Amino acid sequence. “\*” corresponds to stop codon.

**Column K** = Nucleotide sequence.

**Column L** = Sequence of start codon (red) and 30 nucleotides upstream. Stretches of A and G residues of 4 or more (which could correspond to Shine Dalgarno sequences) located between 4 and 20 nucleotides upstream of the start codon are indicated in blue.

**Column M** = Original citation.

**Column N** = PMID for original citation.

**Column O** = Notes.
